# Supplementary material
Source: HighWire-hosted journal article supplement (https://bmjopen.bmj.com/content/7/9/e017761)
Supplement: inline-supplementary-material-1 [file inline-supplementary-material-1.pdf]

## SUPPLEMENTARY MATERIAL

**Appendix Table 1** Circumstance of sharp injuries

|                                                          | Medical<br>(%) | doctors<br>(%) | Nurses (%)   | Medical<br>Technicians (%) | Sanitation workers<br>(%) | Students (%) | Other workers (%) | Total (%)    |
|----------------------------------------------------------|----------------|----------------|--------------|----------------------------|---------------------------|--------------|-------------------|--------------|
| Recapping of used<br>needles                             | 414 (9.4%)     |                | 1244 (11.4%) | 35 (8.1%)                  | 19 (2.2%)                 | 237 (16.3%)  | 13 (4.2%)         | 1962 (10.7%) |
| Drawing arterial<br>blood                                | 68 (1.5%)      |                | 122 (1.1%)   | 2 (0.5%)                   | 1 (0.1%)                  | 16 (1.1%)    | 4 (1.3%)          | 213 (1.2%)   |
| Intravenous<br>injection                                 | 91 (2.1%)      |                | 648 (6.0%)   | 3 (0.7%)                   | 6 (0.7%)                  | 83 (5.7%)    | 9 (2.9%)          | 840 (4.6%)   |
| Intramuscular<br>injection                               | 59 (1.3%)      |                | 287 (2.6%)   | 2 (0.5%)                   | 3 (0.3%)                  | 37 (2.5%)    | 0 (0.0%)          | 388 (2.1%)   |
| Drawing venous<br>blood                                  | 35 (0.8%)      |                | 508 (4.7%)   | 98 (22.6%)                 | 4 (0.5%)                  | 62 (4.3%)    | 9 (2.9%)          | 716 (3.9%)   |
| Preparing solution                                       | 70 (1.6%)      |                | 1328 (12.2%) | 0 (0.0%)                   | 5 (0.6%)                  | 178 (12.3%)  | 13 (4.2%)         | 1594 (8.7%)  |
| Discard needle into<br>container                         | 128 (2.9%)     |                | 1219 (11.2%) | 20 (4.6%)                  | 58 (6.6%)                 | 110 (7.6%)   | 5 (1.6%)          | 1540 (8.4%)  |
| Removing<br>arteriovenous<br>needle from patient         | 53 (1.2%)      |                | 1723 (15.9%) | 12 (2.8%)                  | 11 (1.3%)                 | 253 (17.4%)  | 6 (1.9%)          | 2058 (11.2%) |
| Cuts by medical<br>instrument during<br>rescuing patient | 149 (3.9%)     |                | 190 (1.8%)   | 1 (0.2%)                   | 0 (0.0%)                  | 12 (0.8%)    | 4 (1.3%)          | 356 (1.9%)   |
| Scalpel cuts                                             | 263 (6.0%)     |                | 66 (0.6%)    | 21 (4.8%)                  | 4 (0.5%)                  | 20 (1.4%)    | 2 (0.6%)          | 376 (2.0%)   |
| Surgical needle<br>stab                                  | 1720 (39.0%)   |                | 394 (3.6%)   | 0 (0.0%)                   | 1 (0.1%)                  | 86 (5.9%)    | 12 (3.8%)         | 2213 (12.1%) |

|                                                           |             |            |             |             |            |             |              |
|-----------------------------------------------------------|-------------|------------|-------------|-------------|------------|-------------|--------------|
| Disposal of surgical instruments                          | 177 (4.0%)  | 382 (3.5%) | 4 (0.9%)    | 54 (6.2%)   | 27 (1.9%)  | 35 (11.2%)  | 679 (3.7%)   |
| Handling of medical waste                                 | 113 (2.6%)  | 758 (7.0%) | 21 (4.8%)   | 624 (71.5%) | 102 (7.0%) | 28 (9.0%)   | 1646 (9.0%)  |
| Transmission of medical apparatus and instrument by hands | 333 (7.6%)  | 269 (2.5%) | 9 (2.1%)    | 5 (0.6%)    | 37 (2.5%)  | 2 (0.6%)    | 655 (3.6%)   |
| Dispensing medications                                    | 97 (2.2%)   | 859 (7.9%) | 4 (0.9%)    | 0 (0.0%)    | 76 (5.2%)  | 16 (5.1%)   | 1052 (5.7%)  |
| Others                                                    | 638 (14.5%) | 870 (8.0%) | 201 (46.4%) | 78 (8.9%)   | 115 (7.9%) | 154 (49.4%) | 2056 (11.2%) |

**Appendix** Table 2 Sharp device involved in sharp injuries accidents

|                                     | Medical doctor | Nurse        | Medical<br>Technician | Sanitation workers | Students    | Other workers | Total        |
|-------------------------------------|----------------|--------------|-----------------------|--------------------|-------------|---------------|--------------|
| Scalp wire needle                   | 107 (2.4%)     | 3530 (32.5%) | 12 (2.8%)             | 203 (23.3%)        | 383 (26.4%) | 35 (11.2%)    | 4270 (23.3%) |
| Single-use syringe<br>needle        | 1137 (25.8%)   | 4213 (38.8%) | 95 (21.9%)            | 285 (32.6%)        | 646 (44.5%) | 73 (23.4%)    | 6449 (35.2%) |
| Glass syringe<br>needle             | 15 (0.3%)      | 52 (0.5%)    | 3 (0.7%)              | 16 (1.8%)          | 9 (0.6%)    | 1 (0.3%)      | 96 (0.5%)    |
| Venous catheter<br>introducer       | 75 (1.7%)      | 455 (4.2%)   | 1 (0.2%)              | 38 (4.4%)          | 69 (4.8%)   | 5 (1.6%)      | 643 (3.5%)   |
| Arterial catheter<br>introducer     | 23 (0.5%)      | 30 (0.3%)    | 1 (0.2%)              | 10 (1.1%)          | 7 (0.5%)    | 0 (0.0%)      | 71 (0.4%)    |
| Prefilled syringe<br>needle         | 10 (0.2%)      | 51 (0.5%)    | 0 (0.0%)              | 7 (0.8%)           | 4 (0.3%)    | 1 (0.3%)      | 73 (0.4%)    |
| Tapping needle                      | 99 (2.2%)      | 44 (0.4%)    | 2 (0.5%)              | 18 (2.1%)          | 19 (1.3%)   | 5 (1.6%)      | 187 (1.0%)   |
| Finger lancet                       | 8 (0.2%)       | 72 (0.7%)    | 43 (9.9%)             | 8 (0.9%)           | 8 (0.6%)    | 2 (0.6%)      | 141 (0.8%)   |
| Suture needle                       | 17 (0.4%)      | 49 (0.5%)    | 3 (0.7%)              | 7 (0.8%)           | 3 (0.2%)    | 3 (1.0%)      | 82 (0.4%)    |
| Blood glucose<br>lancet             | 20 (0.5%)      | 99 (0.9%)    | 0 (0.0%)              | 5 (0.6%)           | 14 (1.0%)   | 1 (0.3%)      | 139 (0.8%)   |
| Butterfly / winged<br>needle        | 6 (0.1%)       | 30 (0.3%)    | 3 (0.7%)              | 11 (1.3%)          | 5 (0.3%)    | 1 (0.3%)      | 56 (0.3%)    |
| Arterial blood<br>collection needle | 31 (0.7%)      | 83 (0.8%)    | 1 (0.2%)              | 6 (0.7%)           | 8 (0.6%)    | 0 (0.0%)      | 129 (0.7%)   |
| Catheter needle                     | 21 (0.5%)      | 33 (0.3%)    | 1 (0.2%)              | 2 (0.2%)           | 4 (0.3%)    | 0 (0.0%)      | 61 (0.3%)    |
| Vacuum tube<br>blood collection     | 10 (0.2%)      | 326 (3.0%)   | 49 (11.3%)            | 8 (0.9%)           | 33 (2.3%)   | 5 (1.6%)      | 431 (2.3%)   |

|                               |              |            |            |           |            |             |              |
|-------------------------------|--------------|------------|------------|-----------|------------|-------------|--------------|
| needle                        |              |            |            |           |            |             |              |
| Scalpel blade                 | 268 (6.1%)   | 148 (1.4%) | 17 (3.9%)  | 16 (1.8%) | 23 (1.6%)  | 3 (1.0%)    | 475 (2.6%)   |
| Razor                         | 4 (0.1%)     | 42 (0.4%)  | 0 (0.0%)   | 4 (0.5%)  | 3 (0.2%)   | 0 (0.0%)    | 53 (0.3%)    |
| Scissor                       | 31 (0.7%)    | 90 (0.8%)  | 6 (1.4%)   | 21 (2.4%) | 8 (0.6%)   | 16 (5.1%)   | 172 (0.9%)   |
| Electrotome                   | 29 (0.7%)    | 12 (0.1%)  | 0 (0.0%)   | 1 (0.1%)  | 0 (0.0%)   | 1 (0.3%)    | 43 (0.2%)    |
| Surgical suture<br>needle     | 1804 (40.9%) | 609 (5.6%) | 1 (0.2%)   | 18 (2.1%) | 103 (7.1%) | 35 (11.2%)  | 2570 (14.0%) |
| Medullary cavity<br>amplifier | 78 (1.8%)    | 69 (0.6%)  | 3 (0.7%)   | 1 (0.1%)  | 9 (0.6%)   | 0 (0.0%)    | 160 (0.9%)   |
| Microtome knife               | 38 (0.9%)    | 21 (0.2%)  | 46 (10.6%) | 3 (0.3%)  | 2 (0.1%)   | 11 (3.5%)   | 121 (0.7%)   |
| Bone cutter                   | 7 (0.2%)     | 2 (0.0%)   | 0 (0.0%)   | 0 (0.0%)  | 0 (0.0%)   | 0 (0.0%)    | 9 (0.0%)     |
| Bone knife                    | 10 (0.2%)    | 3 (0.0%)   | 0 (0.0%)   | 0 (0.0%)  | 0 (0.0%)   | 0 (0.0%)    | 13 (0.1%)    |
| Reamed needle                 | 29 (0.7%)    | 17 (0.2%)  | 0 (0.0%)   | 3 (0.3%)  | 1 (0.1%)   | 0 (0.0%)    | 50 (0.3%)    |
| Glass slide                   | 52 (1.2%)    | 168 (1.5%) | 25 (5.8%)  | 76 (8.7%) | 20 (1.4%)  | 5 (1.6%)    | 346 (1.9%)   |
| Glass dropper /<br>tube       | 14 (0.3%)    | 16 (0.1%)  | 23 (5.3%)  | 25 (2.9%) | 2 (0.1%)   | 4 (1.3%)    | 84 (0.5%)    |
| Others                        | 465 (10.5%)  | 603 (5.5%) | 98 (22.6%) | 81 (9.3%) | 68 (4.7%)  | 105 (33.7%) | 1420 (7.7%)  |
